# Supplementary material for: Awareness of Malocclusion Is Closely Associated with Allergic Rhinitis, Asthma, and Arrhythmia in Late Adolescents
Source: PubMed Central journal article supplement (PMC7551248; doi:10.3390/healthcare8030209), 2020-07-12
Supplement: healthcare-08-00209-s001.pdf [file healthcare-08-00209-s001.pdf]

Awareness of malocclusion

|                                                                                     |                          |                          |
|-------------------------------------------------------------------------------------|--------------------------|--------------------------|
| <i>Do you have any difficulties chewing food due to malalignment of your teeth?</i> | Yes                      | No                       |
|                                                                                     | <input type="checkbox"/> | <input type="checkbox"/> |

Medical History

*Please choose the presence or absence of the following disease(s)/disorder(s). When you chose the presence of a history for diseases/disorders, please write the specific name(s) of the disease(s)/disorder(s).*

|    |                                                          | Presence                 | Absence                  | Name of disease(s)/disorder(s) |
|----|----------------------------------------------------------|--------------------------|--------------------------|--------------------------------|
| 1  | Neuromasacular disease                                   | <input type="checkbox"/> | <input type="checkbox"/> |                                |
| 2  | Cerebrovascular disease                                  | <input type="checkbox"/> | <input type="checkbox"/> |                                |
| 3  | Coronary artery disease                                  | <input type="checkbox"/> | <input type="checkbox"/> |                                |
| 4  | The other vascular disease                               | <input type="checkbox"/> | <input type="checkbox"/> |                                |
| 5  | Heart disease, arrhythmia, or abnormal electrocardiogram | <input type="checkbox"/> | <input type="checkbox"/> |                                |
| 6  | Hypertention                                             | <input type="checkbox"/> | <input type="checkbox"/> |                                |
| 7  | Respiratory disease                                      | <input type="checkbox"/> | <input type="checkbox"/> |                                |
| 8  | Esophagus, gastrointestinal disease                      | <input type="checkbox"/> | <input type="checkbox"/> |                                |
| 9  | Liver, gall bladder, pancreatic disease                  | <input type="checkbox"/> | <input type="checkbox"/> |                                |
| 10 | Renal disease                                            | <input type="checkbox"/> | <input type="checkbox"/> |                                |
| 11 | Hyperuricemia, gout                                      | <input type="checkbox"/> | <input type="checkbox"/> |                                |
| 12 | Diabetes mellitus                                        | <input type="checkbox"/> | <input type="checkbox"/> |                                |
| 13 | Dyslipidemia                                             | <input type="checkbox"/> | <input type="checkbox"/> |                                |
| 14 | Thyroid disease                                          | <input type="checkbox"/> | <input type="checkbox"/> |                                |
| 15 | Endocrine disease                                        | <input type="checkbox"/> | <input type="checkbox"/> |                                |
| 16 | Collagen disease                                         | <input type="checkbox"/> | <input type="checkbox"/> |                                |
| 17 | Blood disease                                            | <input type="checkbox"/> | <input type="checkbox"/> |                                |
| 18 | Malignant neoplasm                                       | <input type="checkbox"/> | <input type="checkbox"/> |                                |
| 19 | Allergic disease                                         | <input type="checkbox"/> | <input type="checkbox"/> |                                |
| 20 | Eye disease                                              | <input type="checkbox"/> | <input type="checkbox"/> |                                |
| 21 | Otorhinolaryngologic disease                             | <input type="checkbox"/> | <input type="checkbox"/> |                                |
| 22 | Skin disease                                             | <input type="checkbox"/> | <input type="checkbox"/> |                                |
| 23 | Bone, joint, muscle diseases                             | <input type="checkbox"/> | <input type="checkbox"/> |                                |
| 24 | Urologic disease, gynecological disease                  | <input type="checkbox"/> | <input type="checkbox"/> |                                |
| 25 | The other                                                | <input type="checkbox"/> | <input type="checkbox"/> |                                |

[Abe M et al., *Int J Environ Res Public Health* 2020, 17(12):E4290.]
